# Supplementary material for: Bioactive 3D porous cobalt-doped alginate/waterborne polyurethane scaffolds with a coral reef-like rough surface for nerve tissue engineering application
Source: Royal Society of Chemistry journal article supplement (doi:10.1039/d0tb02347g), 2020-11-12
Supplement: d0tb02347g1.pdf [file d0tb02347g1.pdf]

## Supporting Information

### **Bioactive 3D porous cobalt-doped alginate/waterborne polyurethane scaffolds with coral reef-like rough surface for nerve tissue engineering application**

Yue Chen<sup>1</sup>, Xirui Long<sup>1</sup>, Weiwei Lin<sup>1</sup>, Bohong Du<sup>1</sup>, Hang Yin<sup>1</sup>, Wanling Lan<sup>2</sup>, Daiguo Zhao<sup>2</sup>, Zhen Li<sup>1</sup>, Jiehua Li<sup>1</sup>, Feng Luo\*<sup>1</sup> and Hong Tan\*<sup>1</sup>

<sup>1</sup>College of Polymer Science and Engineering, State Key Laboratory of Polymer Materials Engineering, Sichuan University, Chengdu 610065, China;

<sup>2</sup>Sichuan Institute for Food and Drug Control, Chengdu 611731, China;

\*Correspondence address. College of Polymer Science and Engineering, State Key Laboratory of Polymer Materials Engineering, Sichuan University, Chengdu 610065, China. Tel: t86-28-85460961; Fax: t86-28-85405402;

E-mail: fengluo@scu.edu.cn (F.L.) and hongtan@scu.edu.cn (H.T.).

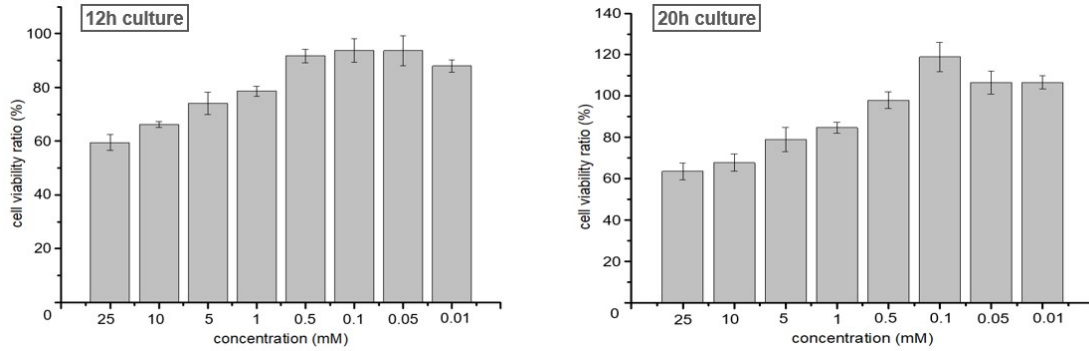

**Figure S1. Pre-experiment on PC12 cytotoxicity of cobalt ions concentration. It should be noticed that this pre-experiment only evaluated the cytotoxicity of cobalt chloride hexahydrate solution, the final cobalt concentration released from the cobalt doped scaffolds would be much lower than the cobalt chloride hexahydrate solution. Therefore, the concentration range of 1-5 mM was chosen as the Co doping concentration range, in which the cell viability was less affected.**

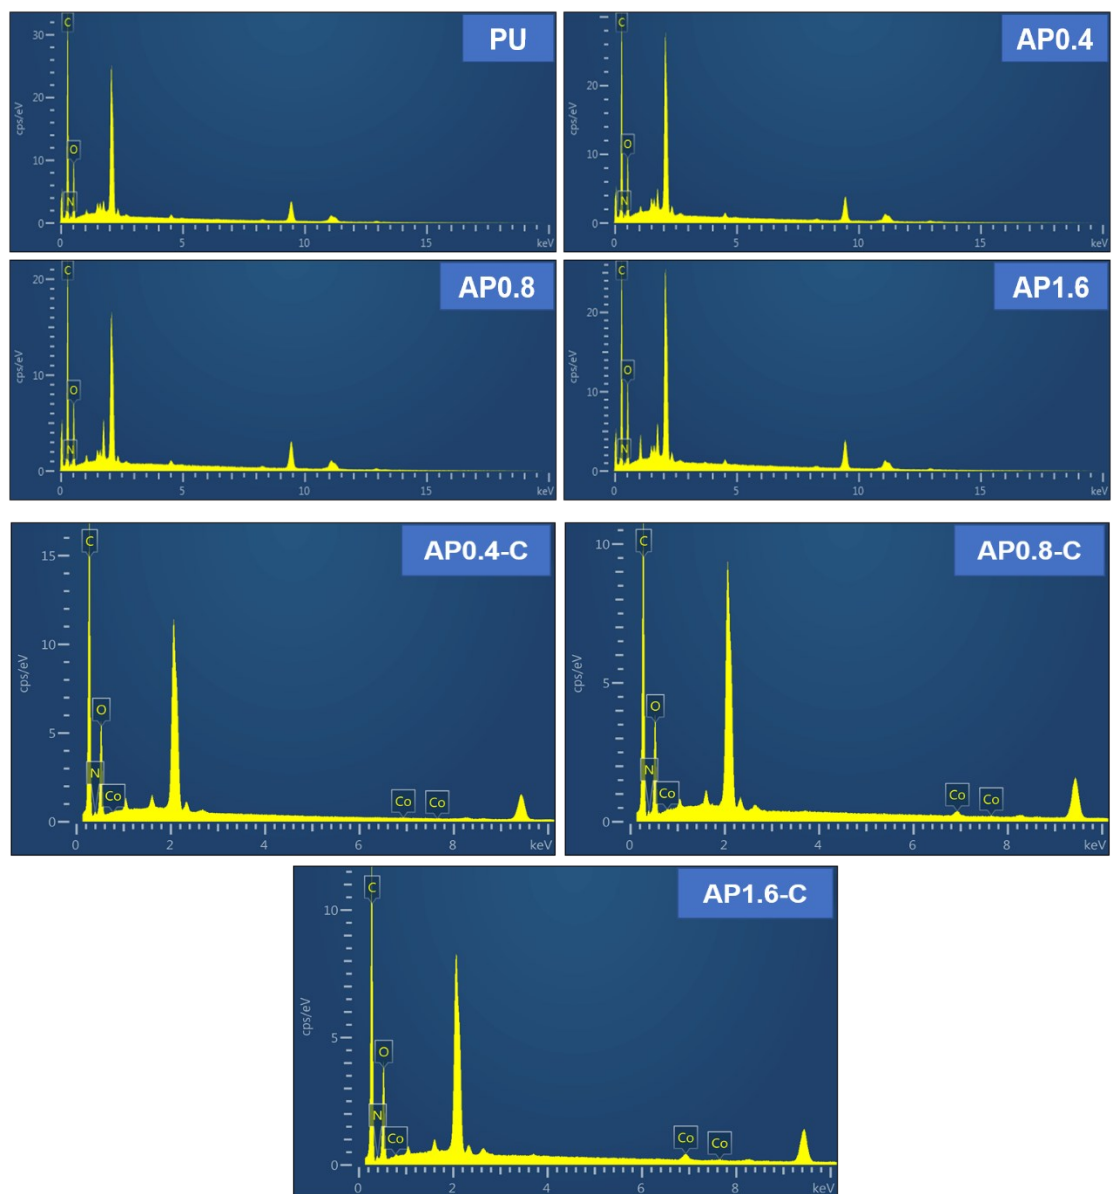

**Figure S2. EDS analysis of scaffolds for C, O, N, Co elements.**

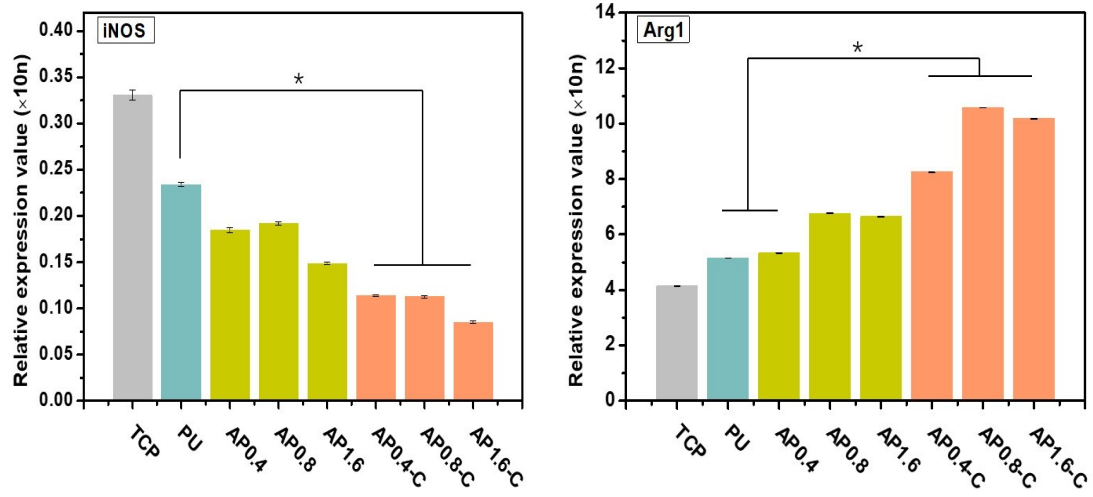

**Figure S3. Relative content of iNOS and Arg1 proteins of BV2 for different scaffolds obtained by Image J.**
